# Supplementary material for: Seasonal prediction of springtime tornado activity in the United States using a hybrid model
Source: Copernicus journal article supplement (doi:10.5194/egusphere-2026-536), 2026-02-04
Supplement: Supplementary file 1 [file egusphere-2026-536-supplement.pdf]

Supplemental Figures for Manuscript.

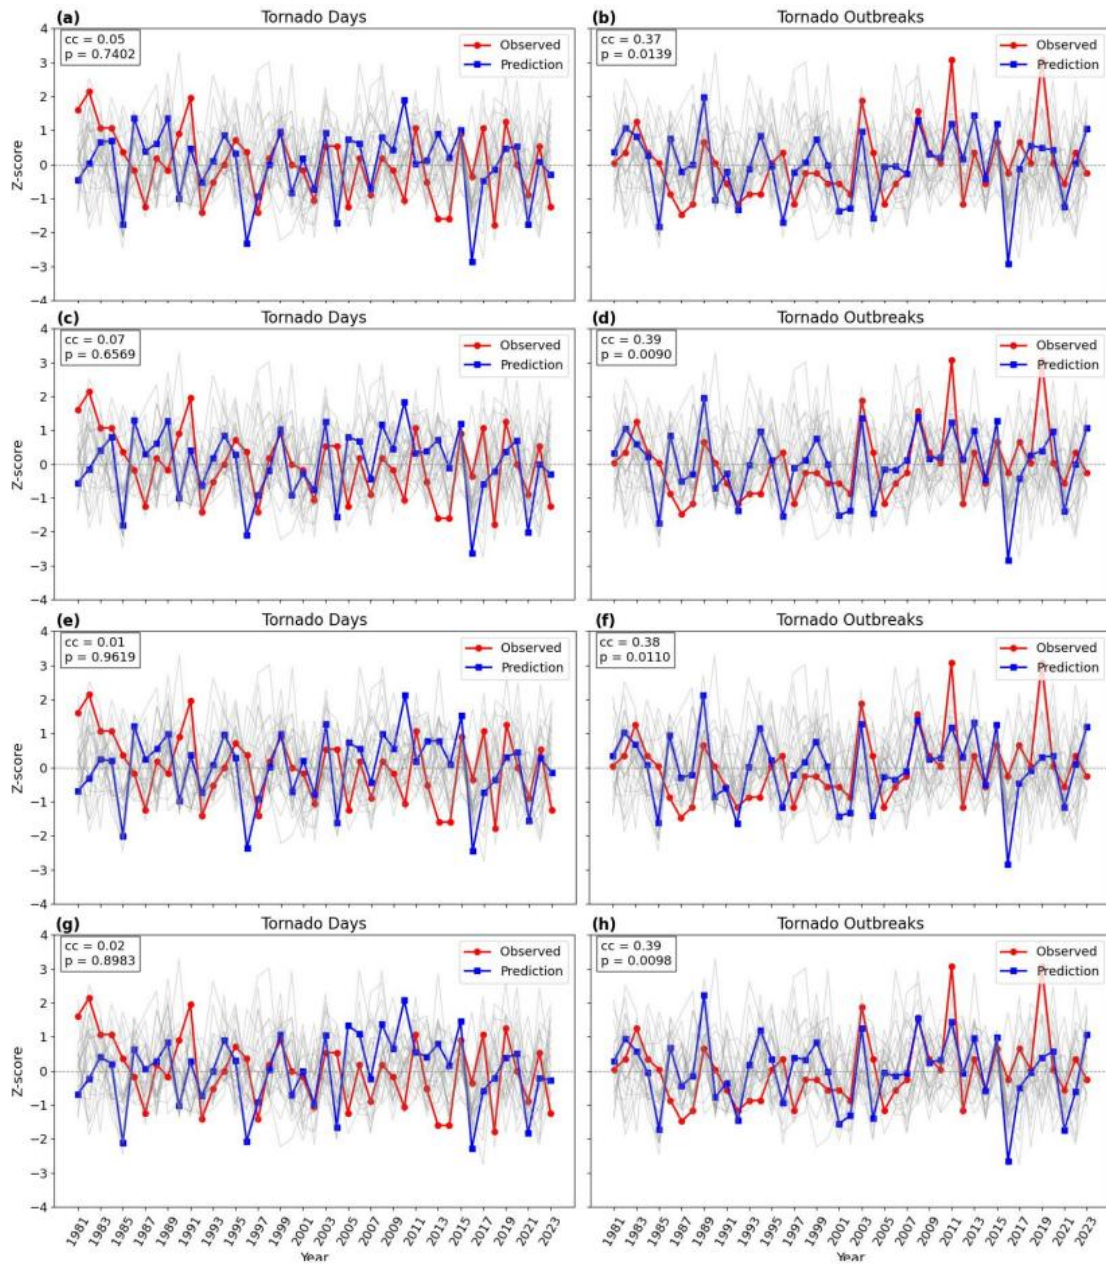

**Figure S1:** Cross-validation tests for tornado days and outbreaks using two-year (a-b), three-year (c-d), four-year (e-f), and six-year (g-h) testing periods. Pearson correlation and p-values are labeled on each plot.

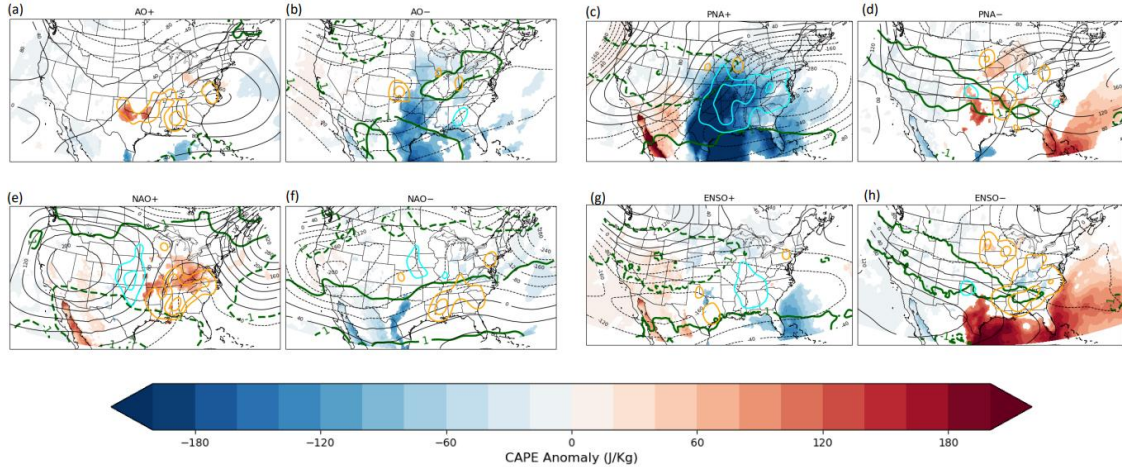

**Figure S2:** 500h anomalies (units: m; black contours) for positive and negative years of AO (top left), NAO (bottom left), PNA (top right), and ENSO (bottom right) overlaid with daily maximum CAPE anomalies (units:  $\text{J Kg}^{-1}$ ; red/blue filled contours),  $2^\circ \times 2^\circ$  uniform-filtered daily mean vertical wind shear anomalies (units:  $\text{m s}^{-1}$ , green contours) and Gaussian smoothed tornado day probability anomalies (contour intervals:  $\pm 20\%$ ; orange/cyan contours). Significance ( $p \leq 0.05$ ) for anomalies is determined using a one-sample, two-sided t-test to mask out non-significant anomalies.

### Standardized April-May Indices (1981-2023) with Linear Trends

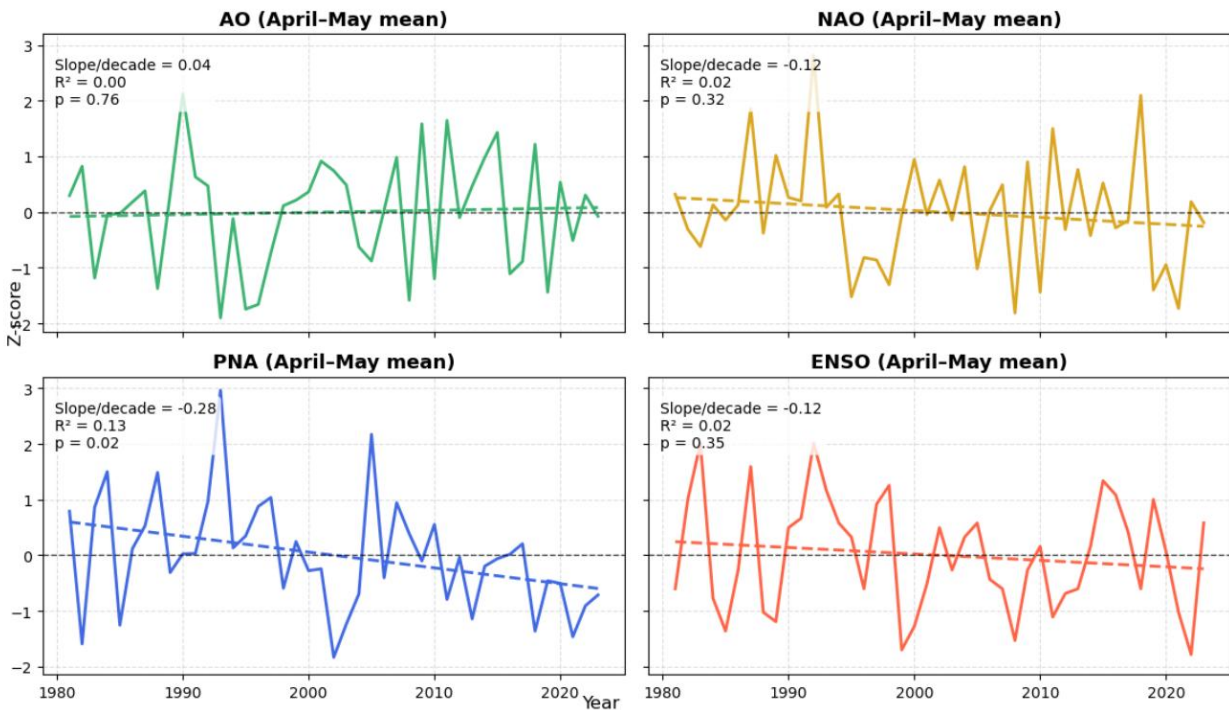

**Figure S3:** Time series of April-May normalized indices for AO, NAO, PNA, and ENSO with linear regression statistics in the top left of each panel.
